# Supplementary material for: PD1 blockade enhances K+ channel activity, Ca2+ signaling, and migratory ability in cytotoxic T lymphocytes of patients with head and neck cancer
Source: HighWire-hosted journal article supplement (doi:10.1136/jitc-2020-000844), 2020-10-01
Supplement: jitc-2020-000844supp009_data_supplement.pdf [file jitc-2020-000844supp009_data_supplement.pdf]

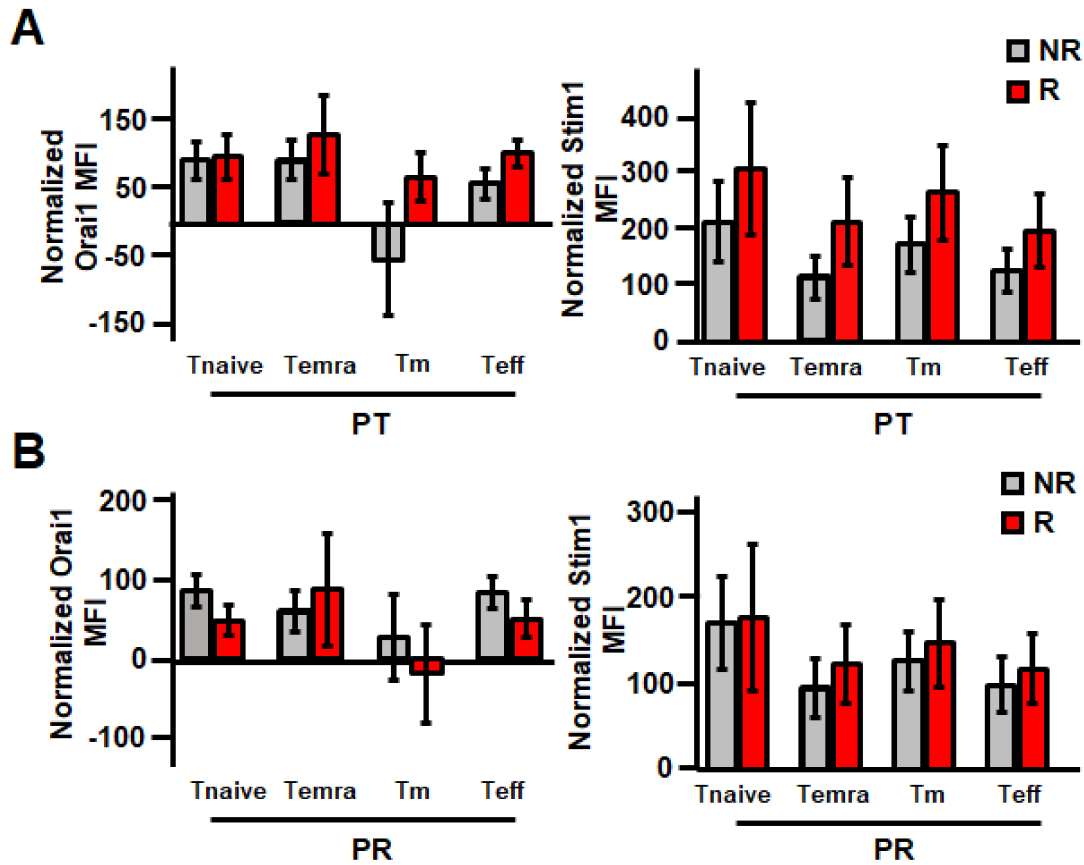

**Supplementary Figure 7. Pembrolizumab treatment does not alter CRAC channel expression.** (A) Cells were gated based on the following: live cells, lymphocytes, CD8<sup>+</sup> cells, memory subtypes using CD45RA and CD127 and then on ion channel expression (left: Orai1, right: Stim1). Normalized Orai1 MFI (left) and normalized Stim1 MFI (right) in post-treatment (PT) resting PBTs within the Tnaive, Temra, Tm, and Teff subsets in non-responder (NR) and responder (R) patients (NR patients n = 10; R patients n = 7) were determined. Orai1 data compared using student's t-test (Tnaive, Temra, Teff) or Mann-Whitney Rank Sum test (Tm). Stim1 data compared using student's t-test (Temra, Tm, Teff) or Mann-Whitney Rank Sum test (Tnaive). Statistical test determined by data normality and variance. (B) Cells were gated based on the following: live cells, lymphocytes, CD8<sup>+</sup> cells, memory subtypes using CD45RA and CD127 and then on ion channel expression (left: Orai1, right: Stim1). Normalized Orai1 MFI (left) and normalized Stim1 MFI (right) in post-resection (PR) resting PBTs within the Tnaive, Temra, Tm, and Tem subsets in NR and R patients (NR patients n = 9; R patients n = 5) were determined. Orai1 data compared using student's t-test (Tnaive, Temra, Teff) or Mann-Whitney Rank Sum test (Tm). Stim1 data compared using student's t-test. Statistical test determined by data normality and variance. (A and B) All data are represented as mean  $\pm$  standard error of the mean.
